# Supplementary material for: “Found in Translation”: predicting outcomes of complex organic chemistry reactions using neural sequence-to-sequence models
Source: PubMed Central journal article supplement — Chem Sci. 2018 Jun 22;9(28):6091–8. doi: 10.1039/c8sc02339e (PMC6053976; doi:10.1039/c8sc02339e), 2018-06-22
Supplement: SC-009-C8SC02339E-s001.pdf [file SC-009-C8SC02339E-s001.pdf]

# “Found in Translation”: Predicting Outcomes of Complex Organic Chemistry Reactions using Neural Sequence-to-Sequence Models<sup>†</sup>

Philippe Schwaller,<sup>‡</sup> Theophile Gaudin,<sup>‡</sup> David Lanyi, Costas Bekas and Teodoro Laino

<sup>a</sup> IBM Research, Zurich, Switzerland.

E-mail: {phs,tga,dla,bek,teo}@zurich.ibm.com

<sup>‡</sup> P. S. and T. G. contributed equally to this work.

## 1 Predictions on recent patent reaction

Using the model trained with stereochemical on Lowe’s data, containing reactions from granted patents until September 2016, we predicted the 15418 reactions of the Pistachio database<sup>1,2</sup>. To have a time split we selected all reactions from 2017 with a yield of more than 50% and a single product. Reactions that had the same reactants as a reaction in the training set were filtered out and prediction input duplicates, as well as reactions with incomplete product atom mappings, were removed. The pistachio database was extracted from patents with a similar, but improved workflow, compared to the open source Lowe database. Overall, a top-1 prediction accuracy of 0.60 was achieved. Table 1 shows an overview of the results. It can be seen that more than 97% of the predicted SMILES were valid according to RDKit and that the mean confidence of the invalid predictions was low with 0.41.

The following sections display examples from correctly predicted reactions belonging to diverse subclasses, an example of a falsely predicted reaction with low confidence and an example of a falsely predicted reaction with a high confidence.

**Table 1** Prediction details, classified using the super classes proposed by<sup>3</sup>

|                                          | Count | Accuracy | Mean confidence |
|------------------------------------------|-------|----------|-----------------|
| Pistachio2017                            | 15418 | 0.60     | 0.83            |
| - Classified                             | 11817 | 0.70     | 0.87            |
| - Heteroatom alkylation and arylation    | 2702  | 0.73     | 0.87            |
| - Acylation and related processes        | 2601  | 0.82     | 0.91            |
| - Deprotections                          | 1232  | 0.69     | 0.86            |
| - C-C bond formation                     | 329   | 0.56     | 0.79            |
| - Functional group interconversion (FGI) | 315   | 0.54     | 0.84            |
| - Reductions                             | 1996  | 0.72     | 0.87            |
| - Functional group addition (FGA)        | 1090  | 0.72     | 0.88            |
| - Heterocycle formation                  | 310   | 0.58     | 0.84            |
| - Protections                            | 868   | 0.53     | 0.84            |
| - Oxidations                             | 339   | 0.41     | 0.80            |
| - Resolutions                            | 35    | 0.34     | 0.73            |
| - Unrecognized                           | 3601  | 0.27     | 0.68            |
| Invalid SMILES                           | 429   | 0.00     | 0.41            |
| With stereochemistry                     | 4103  | 0.48     | 0.76            |
| Without stereochemistry                  | 11315 | 0.64     | 0.85            |

## 2 Correct predictions

### Chloro N-arylation

| Namerxn    | 1.3.7                                             | Patent | US20170001976A1 | Yield | 66% |
|------------|---------------------------------------------------|--------|-----------------|-------|-----|
| Reactants  | <chem>Clc1nc(Cl)c2ccccc2n1.NC1Cc2ccccc2C1</chem>  |        |                 |       |     |
| Reagents   | <chem>A_OA_CN(C)C=O A_[K+] A_O=C([O-])[O-]</chem> |        |                 |       |     |
| Products   | <chem>Clc1nc(NC2Cc3ccccc3C2)c2ccccc2n1</chem>     |        |                 |       |     |
| Prediction | <chem>Clc1nc(NC2Cc3ccccc3C2)c2ccccc2n1</chem>     |        |                 |       |     |
| Confidence | 1.00 <span style="float: right;">True</span>      |        |                 |       |     |

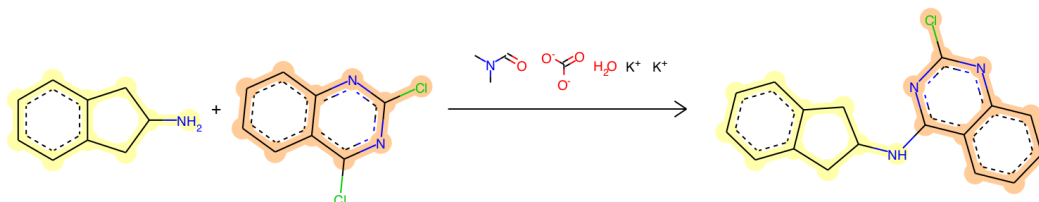

(a) Reaction plotted with rdkit<sup>4</sup>

```
Cl c 1 n c ( N C 2 C c 3 c c c c c 3 C 2 ) c 2 c c c c c 2 n 1 \s
Cl c 1 n c ( N C 2 C c 3 c c c c c 3 C 2 ) c 2 c c c c c 2 n 1 \s
```

(b) Predicted output compared with token probabilities to true output

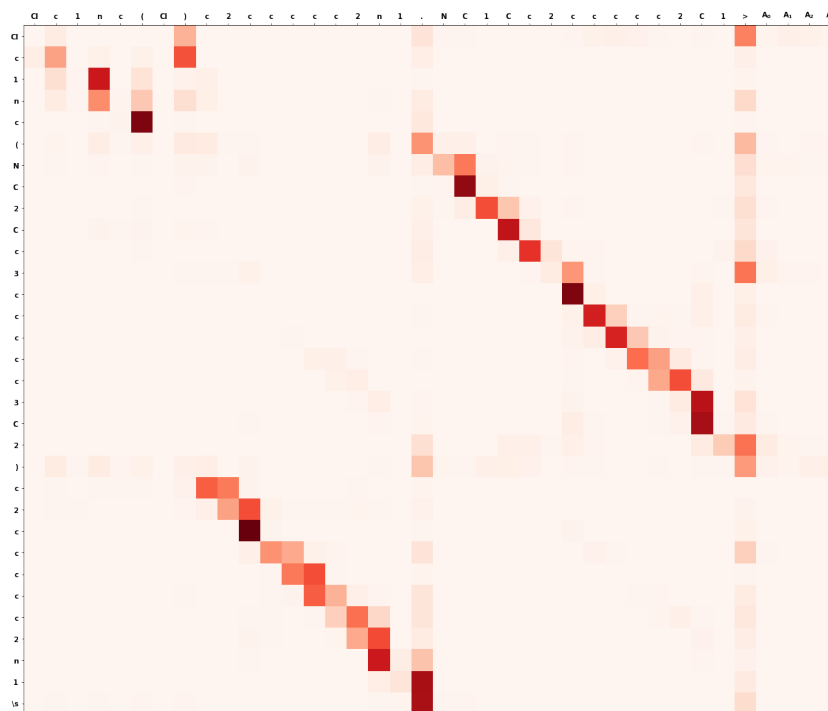

(c) Attention weight matrix. Input tokens horizontal, output tokens vertical.

## Bromo N-alkylation

| Namerxn    | 1.6.2                                                                                  | Patent | US20170002003A1 | Yield | 53%  |
|------------|----------------------------------------------------------------------------------------|--------|-----------------|-------|------|
| Reactants  | <chem>C=C[C@@H]1CN(C(=O)[C@@H]2CCC[C@H]1N2S(=O)(=O)c1cc(Cl)cc(Cl)c1.CCOC(=O)CBr</chem> |        |                 |       |      |
| Reagents   | <chem>A_CN(C)C=O A_[H-] A_CCOCC A_[Na+]</chem>                                         |        |                 |       |      |
| Products   | <chem>C=C[C@@H]1CN(C(=O)OCC)C(=O)[C@@H]2CCC[C@H]1N2S(=O)(=O)c1cc(Cl)cc(Cl)c1</chem>    |        |                 |       |      |
| Prediction | <chem>C=C[C@@H]1CN(CC(=O)OCC)C(=O)[C@@H]2CCC[C@H]1N2S(=O)(=O)c1cc(Cl)cc(Cl)c1</chem>   |        |                 |       |      |
| Confidence | 0.76                                                                                   |        |                 |       | True |

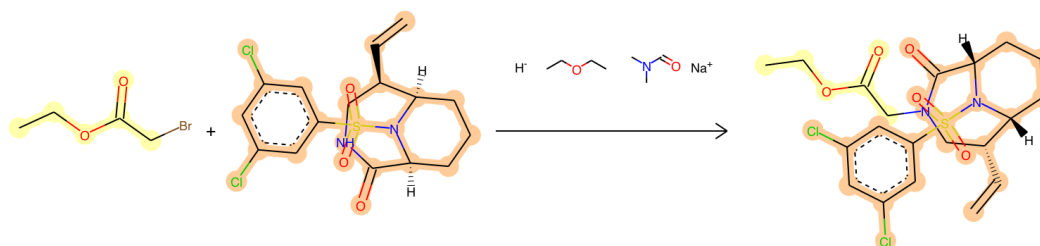(a) Reaction plotted with rdkit<sup>4</sup>

```

C = CC@[1] C N ( C C ( = O ) O C C ) C ( = O ) C @ 2 C C C @ 1 N 2 S ( = O ) ( = O ) c 1 c c c
C = CC@[1] C N ( C C ( = O ) O C C ) C ( = O ) C @ 2 C C C @ 1 N 2 S ( = O ) ( = O ) c 1 c c
( Cl ) c c ( Cl ) c 1 \s
( Cl ) c c ( Cl ) c 1 \s

```

(b) Predicted output compared with token probabilities to true output

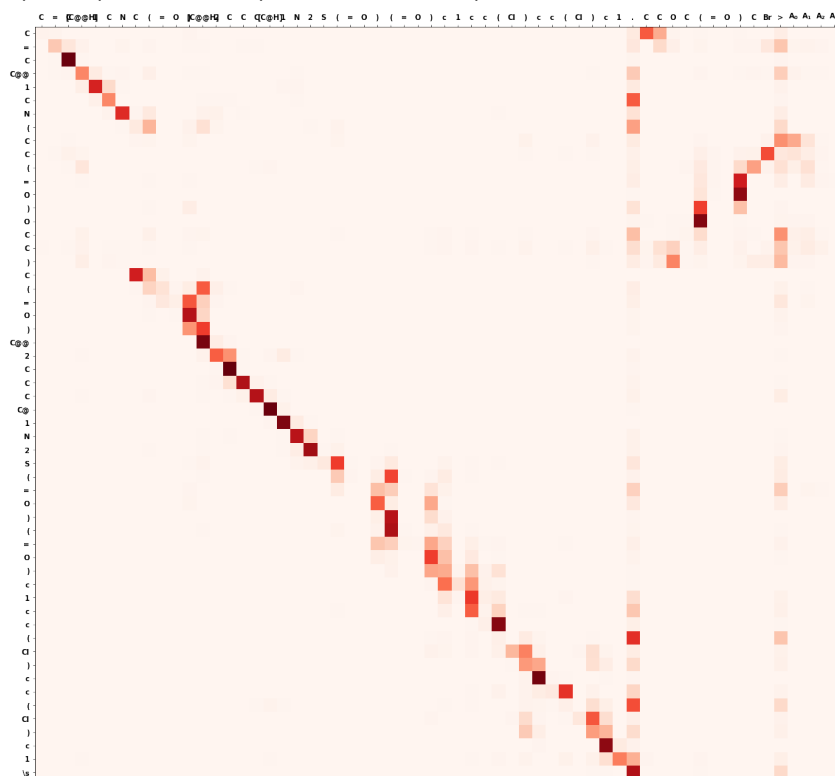

(c) Attention weight matrix. Input tokens horizontal, output tokens vertical.

## 2. CORRECT PREDICTIONS

### Sulfonamide Schotten-Baumann

| Namerxn    | 2.2.3                                                         | Patent | US20170001978A1 | Yield | 97% |
|------------|---------------------------------------------------------------|--------|-----------------|-------|-----|
| Reactants  | <chem>CC(C)(C)OC(=O)N1CCC(c2cccc(N)c2)CC1.CS(=O)(=O)Cl</chem> |        |                 |       |     |
| Reagents   | <chem>A_c1ccnc1.A.ClCl</chem>                                 |        |                 |       |     |
| Products   | <chem>CC(C)(C)OC(=O)N1CCC(c2cccc(NS(C)(=O)=O)c2)CC1</chem>    |        |                 |       |     |
| Prediction | <chem>CC(C)(C)OC(=O)N1CCC(c2cccc(NS(C)(=O)=O)c2)CC1</chem>    |        |                 |       |     |
| Confidence | 1.00                                                          |        |                 |       |     |

True

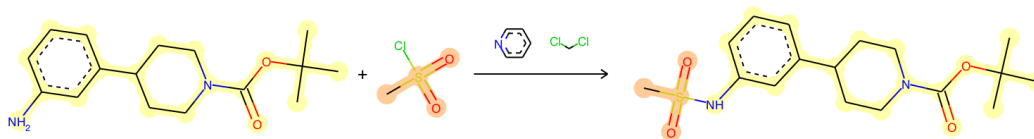

(a) Reaction plotted with rdkit<sup>4</sup>

```

C C ( C ) ( C ) O C ( = O ) N 1 C C C ( c 2 c c c c ( N S ( C ) ( = O ) = O ) c 2 ) C C 1
C C ( C ) ( C ) O C ( = O ) N 1 C C C ( c 2 c c c c ( N S ( C ) ( = O ) = O ) c 2 ) C C 1
  
```

vs  
vs

(b) Predicted output compared with token probabilities to true output

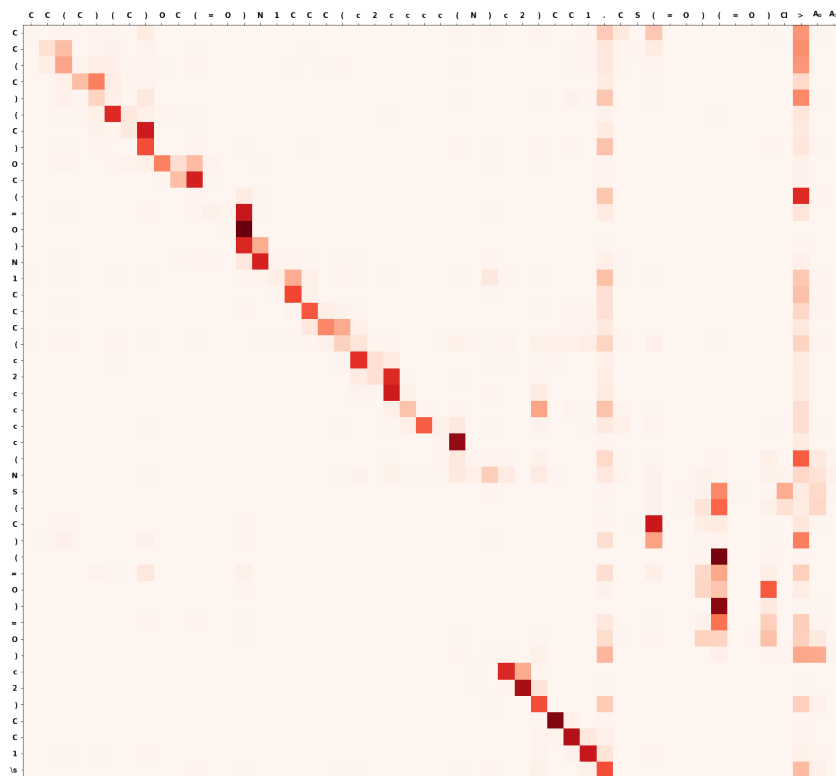

(c) Attention weight matrix. Input tokens horizontal, output tokens vertical.

## Chloro Suzuki-type coupling

| Namerxn    | 3.1.6                                        | Patent | US20170001964A1 | Yield | 95%  |
|------------|----------------------------------------------|--------|-----------------|-------|------|
| Reactants  | <chem>COc1ccc(B(O)O)cc1.N#Cc1ccncc1Cl</chem> |        |                 |       |      |
| Reagents   |                                              |        |                 |       |      |
| Products   | <chem>COc1ccc(-c2ncccc2C#N)cc1</chem>        |        |                 |       |      |
| Prediction | <chem>COc1ccc(-c2ncccc2C#N)cc1</chem>        |        |                 |       |      |
| Confidence | 1.00                                         |        |                 |       | True |

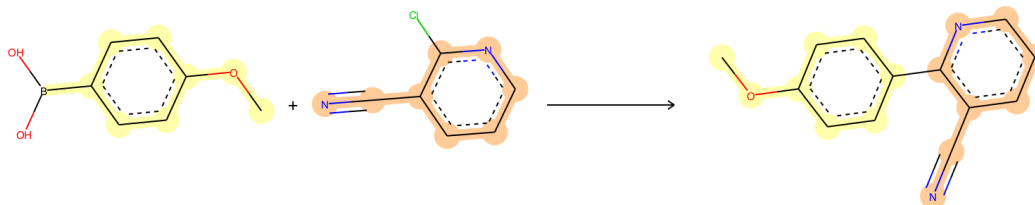(a) Reaction plotted with rdkit<sup>4</sup>

```

C O c 1 c c c ( - c 2 n c c c c 2 C # N ) c c 1 \s
C O c 1 c c c ( - c 2 n c c c c 2 C # N ) c c 1 \s

```

(b) Predicted output compared with token probabilities to true output

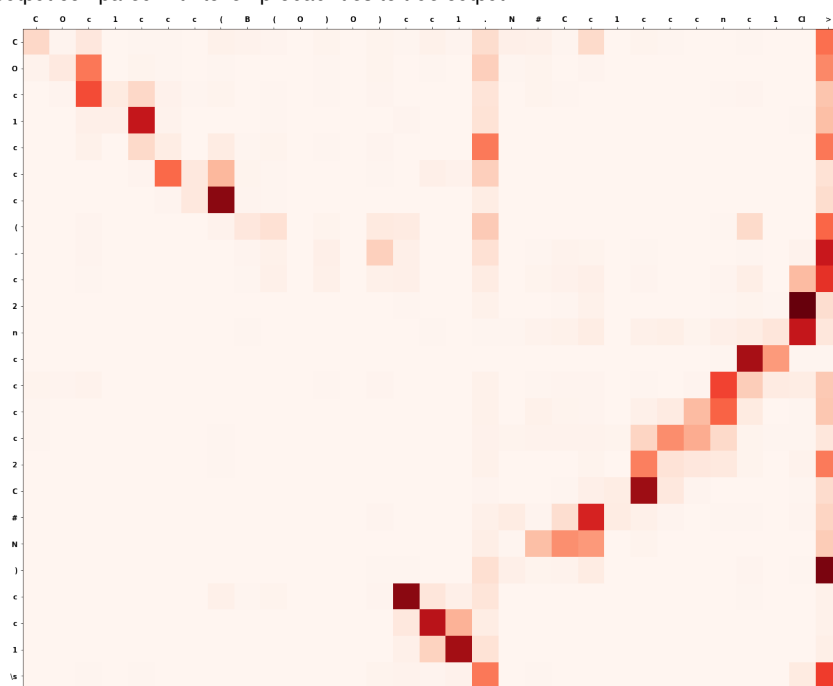

(c) Attention weight matrix. Input tokens horizontal, output tokens vertical.

## 2. CORRECT PREDICTIONS

### O-MOM protection

| Namerxn    | 5.3.6                                                                                        | Patent | US20170001984A1 | Yield | 62%  |
|------------|----------------------------------------------------------------------------------------------|--------|-----------------|-------|------|
| Reactants  | <chem>C O C Cl . C n 1 n c c c 1 [C@H] 1 C [C@H] ( O C c 2 c c c c c 2 ) C [C@@H] 1 O</chem> |        |                 |       |      |
| Reagents   | <chem>A _ O A _ CCN(C(C)C)C(C)C A _ ClCCl</chem>                                             |        |                 |       |      |
| Products   | <chem>C O C O [C@H] 1 C [C@@H] ( O C c 2 c c c c c 2 ) C [C@@H] 1 c 1 c c n n 1 C</chem>     |        |                 |       |      |
| Prediction | <chem>COCO[C@H]1C[C@@H](OCc2ccccc2)C[C@@H]1c1ccnn1C</chem>                                   |        |                 |       |      |
| Confidence | 0.78                                                                                         |        |                 |       | True |

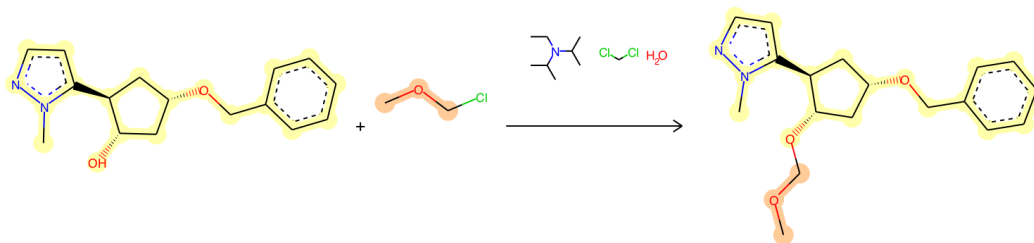

(a) Reaction plotted with rdkit<sup>4</sup>

```

c o c o c @ 1 c c @ @ ( o c c 2 c c c c c 2 ) c c @ @ 1 c 1 c c n n 1 c \s
c o c o c @ 1 c c @ @ ( o c c 2 c c c c c 2 ) c c @ @ 1 c 1 c c n n 1 c \s
  
```

(b) Predicted output compared with token probabilities to true output

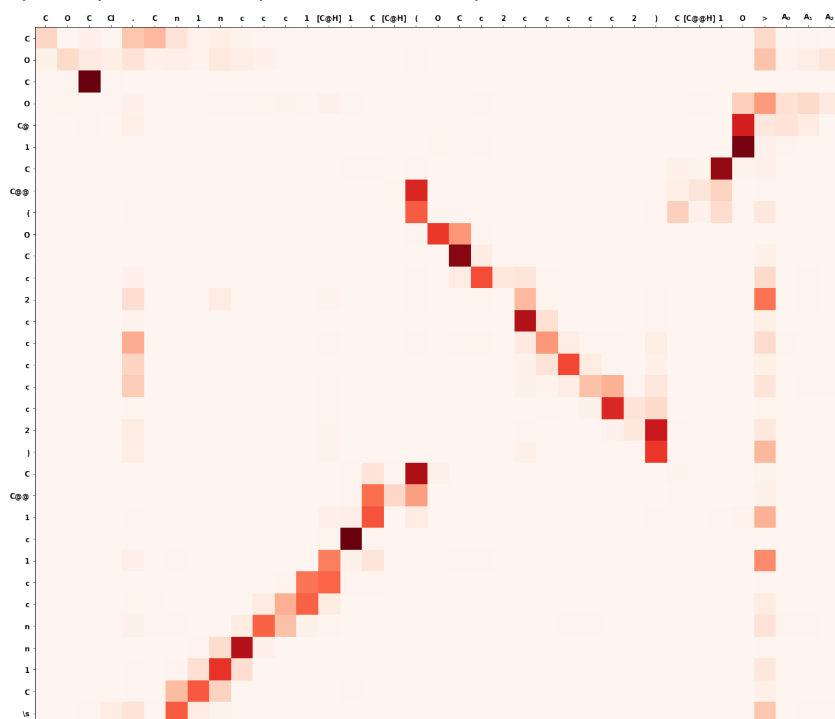

(c) Attention weight matrix. Input tokens horizontal, output tokens vertical.

### 3 Example of a false prediction with low confidence

#### Ketone reductive imination

| Namerxn    | 1.2.6                                                | Patent | US20170001990A1 | Yield | 61% |
|------------|------------------------------------------------------|--------|-----------------|-------|-----|
| Reactants  | <chem>CC(C)(C)S(N)=O.O=C(c1ccsc1)c1cccc(Br)n1</chem> |        |                 |       |     |
| Reagents   | <chem>A_CC[O-]A_C1CCOC1A_OA_[Ti+4]A_CCOC(C)=O</chem> |        |                 |       |     |
| Products   | <chem>CC(C)(C)S(=O)/N=C(/c1ccsc1)c1cccc(Br)n1</chem> |        |                 |       |     |
| Prediction | <chem>CC(C)(C)S(=O)/N=C(1ccsc1)c1cccc(Br)n1</chem>   |        |                 |       |     |
| Confidence | 0.30                                                 |        |                 |       |     |

False

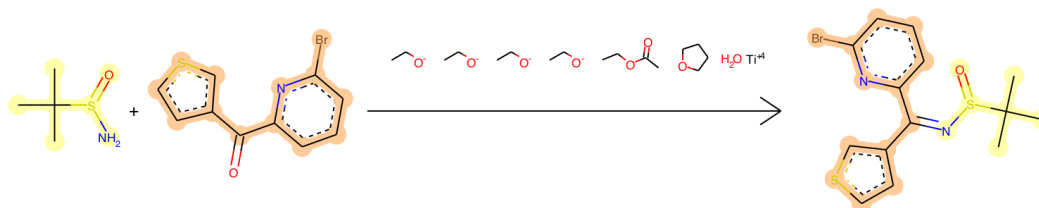(a) Reaction plotted with rdkit<sup>4</sup>

```

C C ( C ) ( C ) S ( = O ) / N = C ( \ c 1 c c s c 1 ) c 1 c c c c ( B r ) n 1 \s
C C ( C ) ( C ) S ( = O ) / N = C ( / c 1 c c s c 1 ) c 1 c c c c ( B r ) n 1 \s

```

(b) Predicted output compared with token probabilities to true output

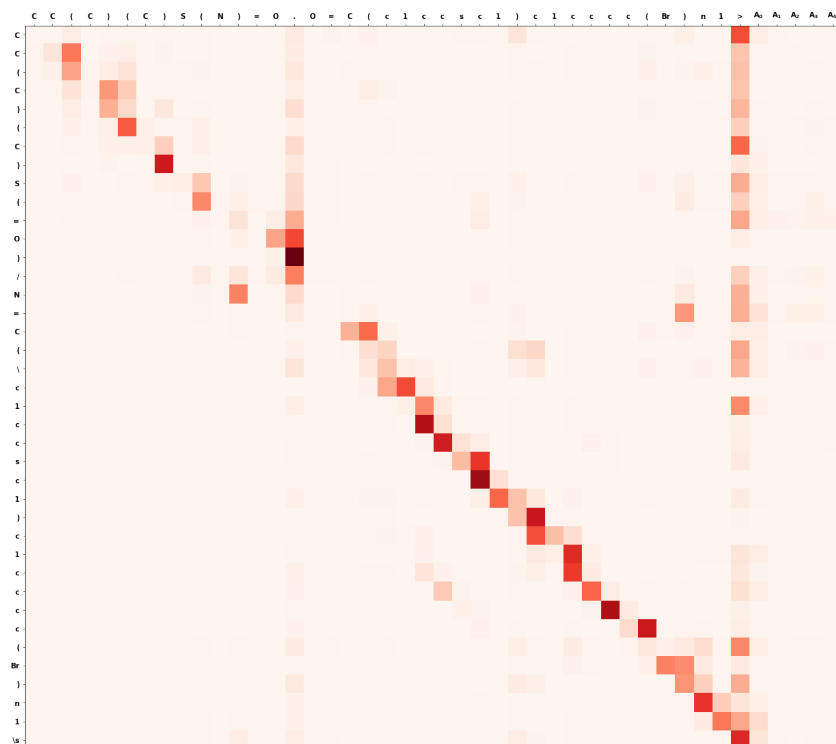

(c) Attention weight matrix. Input tokens horizontal, output tokens vertical.

## 4 Example of a false prediction with high confidence

### Carboxylic acid + amine condensation

| Namerxn    | 2.1.2                                                                      | Patent | US20170002015A1 | Yield | 55%   |
|------------|----------------------------------------------------------------------------|--------|-----------------|-------|-------|
| Reactants  | <chem>C[C@H](NC(=O)OC(C)(C)C(=O)O.NO</chem>                                |        |                 |       |       |
| Reagents   | <chem>A_C1CCOC1A_CC(C)OC(=O)ClA_CCN(CC)CC A_Cl A_[Na+] A_[OH-] A_CO</chem> |        |                 |       |       |
| Products   | <chem>C[C@H](NC(=O)OC(C)(C)C(=O)NO</chem>                                  |        |                 |       |       |
| Prediction | <chem>C[C@H](NC(=O)OC(C)(C)C(=O)NO</chem>                                  |        |                 |       |       |
| Confidence | 0.98                                                                       |        |                 |       | False |

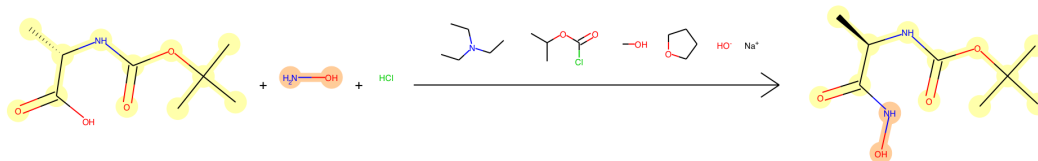

(a) Reaction plotted with rdkit<sup>4</sup>

```
C C @ ( N C ( = O ) O C ( C ) ( C ) C ( = O ) N O \s
C C @ @ ( N C ( = O ) O C ( C ) ( C ) C ( = O ) N O \s
```

(b) Predicted output compared with token probabilities to true output

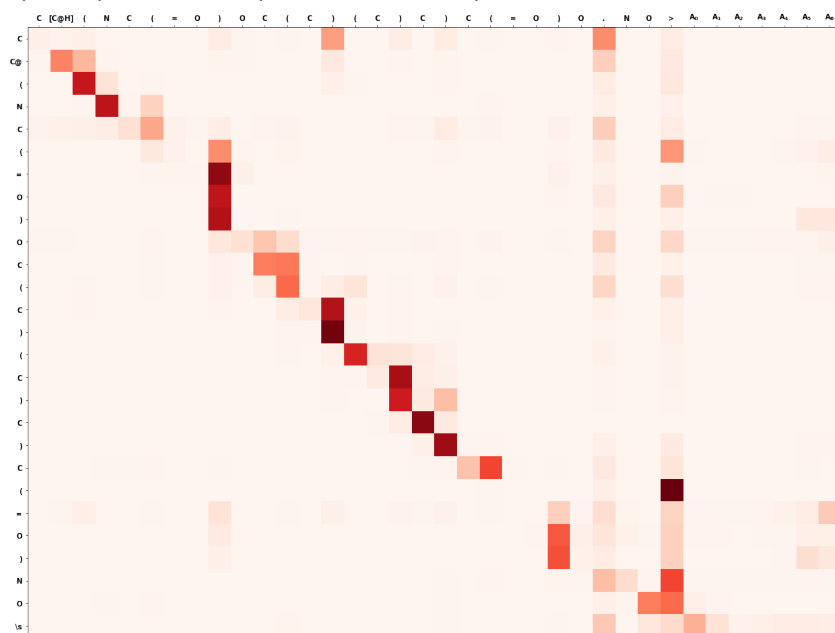

(c) Attention weight matrix. Input tokens horizontal, output tokens vertical.



## Notes and references

- 1 N. Schneider, D. M. Lowe, R. A. Sayle, M. A. Tarselli and G. A. Landrum, *J. Med. Chem.*, 2016, **59**, 4385–4402.
- 2 <https://www.nextmovesoftware.com/pistachio.html>.
- 3 J. S. Carey, D. Laffan, C. Thomson and M. T. Williams, *Org. Biomol. Chem.*, 2006, **4**, 2337–2347.
- 4 G. Landrum, B. Kelley, P. Tosco, S. Riniker, Gedeck, N. Schneider, R. Vianello, A. Dalke, S. Alexander, S. Turk, M. Swain, B. Cole, JP, Strets123, JIVarjo, A. Pahl, P. Fuller, G. Doliath, M. Wójcikowski, D. Cosgrove, G. Sforna, M. Nowotka, J. H. Jensen, J. Domański, D. Hall, N. O'Boyle, W.-G. Bolick, Nhfechner and S. Roughley, *Rdkit/Rdkit: 2017\_09\_1 (Q3 2017) Release*, 2017, <https://zenodo.org/record/1004356#.Wd3LDY612EI>.
